# Supplementary material
Source: publisher figshare collection journal article supplement (https://karger.figshare.com/articles/dataset/_/5123287)
Supplement: Supplementary file 2 [file 1]

### Supplementary table 1

Characteristics of the patients from whom specimens were used for macrophages isolation, immunohistochemistry or Western blotting

#### a) IMAC isolation with subsequent mRNA isolation for quantitative PCR

Surgical specimens of six „control“ patients without colonic inflammation were used:

| Patient age and gender | Diagnosis        | type of surgery        |
|------------------------|------------------|------------------------|
| 62 yrs, ♂              | rectum carcinoma | rectum exstirpation    |
| 77 yrs, ♂              | rectum carcinoma | rectum resection       |
| 82 yrs, ♀              | rectum carcinoma | rectum resection       |
| 72 yrs, ♂              | rectum carcinoma | rectum exstirpation    |
| 61 yrs, ♂              | colon cancer     | laparoscopic resection |
| 75 yrs, ♀              | colon cancer     | hemicolectomy          |

IMACs and subsequent IMAC mRNA were further isolated from 5 patient with diverticulitis („inflammatory control“)

| Patient age and gender | Diagnosis      | type of surgery        |
|------------------------|----------------|------------------------|
| 66 yrs, ♂              | diverticulitis | sigmoid resection      |
| 61 yrs, ♂              | diverticulitis | sigmoid resection      |
| 69 yrs, ♂              | diverticulitis | sigmoid resection      |
| 65 yrs, ♂              | diverticulitis | sigmoid resection      |
| 65 yrs, ♂              | diverticulitis | lap. sigmoid resection |

In addition, IMACs were isolated from eight patients with IBD; three suffering from UC and five from CD

| Patient age and gender | Diagnosis                            | type of surgery         |
|------------------------|--------------------------------------|-------------------------|
| 36 yrs, ♀              | pancolitis, UC                       | colectomy               |
| 43 yrs, ♂              | pancolitis, UC                       | procto-colectomy        |
| 23 yrs, ♂              | pancolitis, UC                       | procto-colectomy        |
| 15 yrs, ♂              | CD, conglomerate term.<br>ileum      | ileo-cecal resection    |
| 22 yrs, ♂              | CD, conglomerate term.<br>ileum      | ileo-cecal resection    |
| 52 yrs, ♀              | CD, colon stenosis                   | lap. hemicolectomy      |
| 17 yrs, ♀              | CD, inflammatory sigmoid<br>stenosis | sigmoid resection       |
| 18 yrs, ♀              | CD, conglomerate, colon              | Colon segment resection |

**b) Isolation of peripheral blood monocytes with subsequent mRNA isolation for quantitative PCR from 15-14 IBD patients**

| <b>Patient age and gender</b> | <b>Diagnosis and clinical evaluation of activity</b> | <b>treatment</b> |
|-------------------------------|------------------------------------------------------|------------------|
| 51 yrs, ♂                     | CD, active                                           | steroids         |
| 30 yrs, ♀                     | CD, active                                           | steroids         |
| 41 yrs, ♀                     | CD, active                                           | no steroids      |
| 44 yrs, ♀                     | UC, active                                           | no steroids      |
| 23 yrs, ♀                     | CD, active                                           | no steroids      |
| 34 yrs, ♂                     | CD, active                                           | no steroids      |
| 60 yrs, ♂                     | UC, active                                           | no steroids      |
| 49 yrs, ♀                     | UC, remission                                        | steroids         |
| 35 yrs, ♂                     | UC, remission                                        | steroids         |
| 38 yrs, ♀                     | CD, remission                                        | steroids         |
| 46 yrs, ♀                     | CD, remission                                        | no steroids      |
| 42 yrs, ♀                     | CD, remission                                        | no steroids      |
| 31 yrs, ♂                     | CD, remission                                        | no steroids      |
| 26 yrs, ♂                     | CD, remission                                        | no steroids      |

In addition, blood monocytes were isolated from six healthy donors;

In vitro differentiated macrophages were generated from monocytes of six different voluntary healthy donors.

**c) Specimens used for immunohistochemistry**

| <b>Patient age and gender</b> | <b>Diagnosis</b> | <b>type of surgery</b>                        |
|-------------------------------|------------------|-----------------------------------------------|
| 73 yrs, ♂                     | control          | rectum exstirpation                           |
| 50 yrs, ♀                     | control          | diverticulosis                                |
| 53 yrs, ♂                     | control          | sigmoid stricture (diverticulitis)            |
| 64 yrs, ♀                     | control          | diverticulitis                                |
| 71 yrs, ♀                     | control          | stricured diverticulitis                      |
| 60 yrs, ♂                     | control          | left-sided hemicolectomie                     |
| 48 yrs, ♀                     | control          | lap. sigmoid-resection                        |
| 27 yrs, ♂                     | CD               | ileo-cecal resection                          |
| 39 yrs, ♂                     | CD               | ileo-cecal resection                          |
| 51 yrs, ♀                     | CD               | subtotal colectomy                            |
| 36 yrs, ♂                     | CD               | stricture, colon segment resection            |
| 20 yrs, ♂                     | CD               | colon segment resection, ileo-cecal resection |
| 39 yrs, ♂                     | CD               | colon segment resection, fistula excision     |
| 23 yrs, ♂                     | UC               | procto-colectomy                              |
| 46 yrs, ♂                     | UC               | procto-colectomy                              |
| 44 yrs, ♂                     | UC               | stricture, colon segment resection            |
| 23 yrs, ♂                     | UC               | colectomy                                     |
| 56 yrs, ♀                     | UC               | procto-colectomy                              |
| 45 yrs, ♂                     | UC               | procto-colectomy                              |

**c) Specimens used for protein lysates for Western blots and proteasome activity assays**

Protein lysates of nine control patients were used

| <b>Patient age and gender</b> | <b>Diagnosis</b>                     | <b>type of surgery</b> |
|-------------------------------|--------------------------------------|------------------------|
| 65 yrs, ♀                     | sigmoid cancer                       | sigmoid resection      |
| 30 yrs, ♀                     | slow transit obstipation             | colectomy              |
| 37 yrs, ♀                     | sigmoid cancer                       | sigmoid resection      |
| 66 yrs, ♂                     | rectum carcinoma                     | rectum resection       |
| 68 yrs, ♀                     | cecal adenoma                        | ileo cecal resection   |
| 63 yrs, ♂                     | IBS with severe pain and obstipation | endoscopic biopsies    |
| 34 yrs, ♂                     | IBS with severe pain and obstipation | endoscopic biopsies    |
| 58 yrs, ♀                     | Rectum carcinoma                     | rectum resection       |
| 67 yrs, ♂                     | Rectum carcinoma                     | rectum resection       |

In addition protein lysates were obtained from 8 patients with IBD:

| <b>Patient age and gender</b> | <b>Diagnosis</b>                                    | <b>type of surgery</b> |
|-------------------------------|-----------------------------------------------------|------------------------|
| 46 yrs, ♂                     | UC, mild activity                                   | endoscopic biopsies    |
| 19 yrs, ♀                     | CD with stricture colon transversum                 | stricture resection    |
| 22 yrs, ♂                     | CD with conglomerate                                | ileo-cecal resection   |
| 42 yrs, ♀                     | CD with severe inflammation and stricture           | ileo-cecal resection   |
| 48 yrs, ♀                     | CD, stricture of anastomosis at ileotransversostomy | stricture resection    |
| 33 yrs, ♂                     | CD mild inflammation                                | endoscopic biopsies    |
| 32 yrs, ♀                     | CD, stricture                                       | endoscopic biopsies    |
| 16 yrs, ♂                     | CD with conglomerate at terminal ileum              | ileo-cecal resection   |

## Supplementary table 2: List of antibodies used

### A) Immunohistochemistry

|                                                                     |                                      |
|---------------------------------------------------------------------|--------------------------------------|
| Alexa Flour® 488 goat-anti rabbit IgG (H+L), FITC                   | Invitrogen, Carlsbad, CA             |
| Alexa Flour® 546 goat-anti mouse IgG (H+L), PE                      | Invitrogen, Carlsbad, CA             |
| Biotin-SP-conjugated AffiniPure Goat-anti-Mouse IgG                 | Jackson Immuno Research Laboratories |
| Goat-anti-Rabbit-IgG, Biotin Conjugate                              | Sigma-Aldrich                        |
| Mouse IgG1, Negative Control                                        | DakoCytomation, Glostrup, Denmark    |
| Mouse-anti-human CD68, Macrophage CLONE KP1                         | DakoCytomation, Glostrup, Denmark    |
| Rabbit Immunoglobulin Fraction, Negative Control                    | DakoCytomation, Glostrup, Denmark    |
| UBE2L6 Antibody (N-Term), Purified Rabbit Polyclonal Antibody (Pab) | Abgent, San Diego, USA               |
| Ubiquitin B, Affinity purified Antibody, Rabbit                     | PTG, ProteinTech Group, Chicago      |
| USP14 Antibody (N-Term), Purified Rabbit Polyclonal Antibody (Pab)  | Abgent, San Diego, USA               |

### B) Western Blotting

|                                                                     |                                 |
|---------------------------------------------------------------------|---------------------------------|
| HRP-goat anti-mouse                                                 | Santa Cruz Biotechnology        |
| HRP-goat anti-rabbit                                                | Santa Cruz Biotechnology        |
| Mouse-anti-actin                                                    | Chemicon                        |
| UBB monoclonal Antibody (M01), clone 1F5, mouse                     | Abnova Corporation, Taiwan      |
| UBE2A monoclonal Antibody (M01), clone 3D7-E2, mouse                | Abnova Corporation, Taiwan      |
| UBE2D2 polyclonal antibody (A01), mouse                             | Abnova Corporation, Taiwan      |
| UBE2L6 antibody (N-Term), purified rabbit polyclonal antibody (Pab) | Abgent, San Diego, USA          |
| UBE2L6 mouse                                                        | Abnova Corporation, Taiwan      |
| Ubiquitin B, affinity purified antibody, rabbit                     | PTG, ProteinTech Group, Chicago |

|                                                                    |                                        |
|--------------------------------------------------------------------|----------------------------------------|
| USP14 antibody (N-Term), purified rabbit polyclonal antibody (Pab) | Abgent, San Diego, USA                 |
| anti-CD33 mouse IgG1 monoclonal; Clone:P67.6                       | Miltenyi, Bergisch Gladbach            |
| anti-ATPase 2, rabbit polyclonal                                   | Affinity Research Products, Exeter, UK |
| anti-beta 2, mouse monoclonal                                      | Affinity Research Products, Exeter, UK |
| anti-beta 5, rabbit polyclonal                                     | Affinity Research Products, Exeter, UK |
| anti-MECL-1, rabbit polyclonal                                     | Affinity Research Products, Exeter, UK |
| anti-beta2i/MECL-1, rabbit polyclonal                              | Affinity Research Products, Exeter, UK |
| anti-LMP 7, mouse monoclonal                                       | Affinity Research Products, Exeter, UK |
| Negative control rabbit immunoglobuline fraction                   | DakoCytomation, Hamburg                |
| Mouse IgG1 negative control                                        | DakoCytomation, Hamburg                |
| Goat anti-rabbit                                                   | Sigma-Aldrich Chemie, Steinheim        |
| Goat anti-mouse                                                    | Dianova, Hamburg                       |
| Goat anti-rabbit                                                   | Santa Cruz Biotechnology, Inc.         |
| Goat anti-mouse                                                    | Santa Cruz Biotechnology, Inc.         |
| Mouse anti-actin mouse monoclonal; C4                              | Chemicon                               |



### Supplementary table 3

#### Primer sequences

Gene checker (integrity of mRNA)

| Primer Set  | Sequence                                                                       |
|-------------|--------------------------------------------------------------------------------|
| GAPDH       | 5'-TTA GCA CCC CTG GCC AAG G-3'<br>5'-CTT ACT CCT TGG AGG CCA TG-3'            |
| 5'Actin     | 5'-GCT CAC CAT GGA TGA TGA TAT CGC-3'<br>5'-GGA GGA GCA ATG ATC TTG ATC TTC-3' |
| 3'Actin     | 5'-GAA GAT CAA GAT CAT TGC TCC TCC-3'<br>5'-CTG GTC TCA AGT CAG TGT ACA GG-3'  |
| 6K Clathrin | 5'-GAC AGT GCC ATC ATG AAT CC-3'<br>5'-TTT GTG CTT CTG GAG GAA AGA A-3'        |
| 2K Clathrin | 5'-GCT CAC ATG GGA ATG TTC AC-3'<br>5'-ATG TTG TCA AAG TTG TCA TAA G-3'        |

Primers for Taqman® PCR were purchased from MWG (Ebersberg, Germany). A melting temperature of 60°C was chosen. The internal primer was labelled with 5'-FAM and 3'-TAMRA

#### Primers for proteasomal components

| Primer Set                                  | Sequence                                                                                                            |
|---------------------------------------------|---------------------------------------------------------------------------------------------------------------------|
| ATPase2 for<br>ATPase2 rev<br>ATPase2 probe | 5'- CTT TGG TCC ACC CGG TAC AG -3'<br>5'- CGA ATG AAG CAC GCA TCA GT -3'<br>5'- AAG ACA CTC TGT GCG CGG GCA GTT -3' |
| β2 for<br>β2 rev<br>β2 probe                | 5'- TCG GAC CCC ATA TCA TGT GA -3'<br>5'- CGC TGG CCC TTC ATG CT -3'<br>5'- CCT CCT CCT GGC TGG CTA TGA T -3'       |

|              |                                            |
|--------------|--------------------------------------------|
| β5 for       | 5′ - GGA AGT GGA GCA GGC CTA TG -3′        |
| β5 rev       | 5′ - GCA TCT CTG TAG GTG GCT TGG T -3′     |
| β5 probe     | 5′ - TCT GGC CCG TCG AGC CAT C -3′         |
| MEC1-1 for   | 5′ - TCT GGG CGC CGA TAC G -3′             |
| MEC1-1 rev   | 5′ - GGA TCT TCT CGC AGC TCT TGT C -3′     |
| MEC1-1 probe | 5′ - CCA CTA ACG ATT CGG TCG TGG C -3′     |
| LMP7 for     | 5′ - GCC TGC TGG CCA AGG AAT -3′           |
| LMP7 rev     | 5′ - GCT GCC GAC ACT GAA ATA CGT -3′       |
| LMP7 probe   | 5′ - CAG GCT GTA CTA TCT GCG AAA TGG A -3′ |

### Primers for ubiquitinylation genes

| Primer Set  | Sequence                                                 |
|-------------|----------------------------------------------------------|
| E2A for     | 5′ - AGA ACC GTT GGA GTC CAA CCT - 3′                    |
| E2A rev     | 5′ - TGG GTT CAT CCA ACA GAG ACT GT - 3′                 |
| E2A probe   | 5′ - TGA TGT GTC TTC CAT TCT AAC ATC C - 3′              |
| E2D2 for    | 5′ - TTC AAA AGT ACT CTT GTC CAT CTG TTC - 3′            |
| E2D2 rev    | 5′ - CCG AGC AAT CTC AGG CAC TAA - 3′                    |
| E2D2 probe  | 5′ - CTG TTG TGT GAT CCC AAT CCA GAT GAT CC - 3′         |
| E2L6 for    | 5′ - TTT GCC TGC CCA TCA TCA G - 3′                      |
| E2L6 rev    | 5′ - CCT CCA GGA CTT GGC AAG TC - 3′                     |
| E2L6 probe  | 5′ - TGA GAA CTG GAA GCC TTG CAC CA - 3′                 |
| USP14 for   | 5′ - CCC ACA GTT TGC CGA GAA AG - 3′                     |
| USP14 rev   | 5′ - CAA TAC TCG CAT CAT TTG TAT CCA A - 3′              |
| USP14 probe | 5′ - TGA ACA AGG ACA GTA TCT TCA ACA GGA TGC TAA TG - 3′ |
| UBB for     | 5′ - GGT GGC TGT TAA TTC TTC AGT CAT G - 3′              |
| UBB rev     | 5′ - GCA ACG AAA CCT TTA TTA ACA TTT TG - 3′             |
| UBB probe   | 5′ - TTA CTC TGC ACT ATA GCC ATT TGC CCC AAC TTA A - 3′  |

**Supplementary table 4:** Affymetrix GeneChip® analysis of proteasomal components

For Affymetrix GeneChip® analysis twice mRNA from three control-patients and from three donors for i.v.MACs was pooled and hybridized onto two chips. Affymetrix® analysis showed a significant downregulation of virtually all proteasomal components. There were 46 probe sets for proteasome-subunits representing 35 different genes. For all probe sets a higher expression in i.v.MACs as compared to IMACs was indicated. The ratio signal(i.v.MACs)/signal(IMACs) was between 1.6 and 13.6 with an average of 4.3. Different probe sets for the same mRNA gave similar results. This pointed to a lower mRNA-expression of all proteasomal components in IMACs from normal mucosa as compared with i.v.MACs.

|    | Gene                                   | Location            | Unigene   | IMACs<br>Signal 1 | IMACs<br>Signal 2 | i.v. MAC<br>Signal 1 | i.v. MAC<br>Signal 2 | Average<br>IMAC | Average<br>i.v. MAC | Ratio<br>(i.v.<br>vs.<br>IMAC |
|----|----------------------------------------|---------------------|-----------|-------------------|-------------------|----------------------|----------------------|-----------------|---------------------|-------------------------------|
| 1  | proteasome 26S subunit, ATPase, 1      | Chr:14q32.11        | Hs.4745   | 382.0             | 561.0             | 1267.0               | 1161.0               | 471.5           | 1214.0              | 2.6                           |
| 2  | proteasome 26S subunit, ATPase, 2      | Chr:7q22.1-q22.3    | Hs.61153  | 380.0             | 491.0             | 2527.0               | 1968.0               | 435.5           | 2247.5              | 5.2                           |
| 3  | proteasome 26S subunit, ATPase, 2      | Chr:7q22.1-q22.3    | Hs.61153  | 70.0              | 100.0             | 289.0                | 285.0                | 85.0            | 287.0               | 3.4                           |
| 4  | proteasome 26S subunit, ATPase, 3      | Chr:11p12-p13       | Hs.250758 | 9.0               | 35.0              | 186.0                | 167.0                | 22.0            | 176.5               | 8.0                           |
| 5  | proteasome 26S subunit, ATPase, 4      | Chr:19q13.11-q13.13 | Hs.211594 | 38.0              | 45.0              | 92.0                 | 71.0                 | 41.5            | 81.5                | 2.0                           |
| 6  | proteasome 26S subunit, ATPase, 6      | Chr:14q22.1         | Hs.79357  | 161.0             | 204.0             | 626.0                | 465.0                | 182.5           | 545.5               | 3.0                           |
| 7  | proteasome 26S subunit, non-ATPase, 1  | Chr:2q37.1          | Hs.3887   | 132.0             | 154.0             | 1001.0               | 810.0                | 143.0           | 905.5               | 6.3                           |
| 8  | proteasome 26S subunit, non-ATPase, 1  | Chr:2q37.1          | Hs.3887   | 75.0              | 170.0             | 558.0                | 415.0                | 122.5           | 486.5               | 4.0                           |
| 9  | proteasome 26S subunit, non-ATPase, 10 | Chr:Xq22.3          | Hs.433559 | 114.0             | 146.0             | 814.0                | 841.0                | 130.0           | 827.5               | 6.4                           |
| 10 | proteasome 26S subunit, non-ATPase, 11 | Chr:17q11.2         | Hs.90744  | 73.0              | 80.0              | 563.0                | 501.0                | 76.5            | 532.0               | 7.0                           |
| 11 | proteasome 26S subunit, non-ATPase, 12 | Chr:17q24.2         | Hs.4295   | 113.0             | 173.0             | 607.0                | 504.0                | 143.0           | 555.5               | 3.9                           |
| 12 | proteasome 26S subunit, non-ATPase, 12 | Chr:17q24.2         | Hs.4295   | 48.0              | 53.0              | 231.0                | 219.0                | 50.5            | 225.0               | 4.5                           |
| 13 | proteasome 26S subunit, non-ATPase, 13 | Chr:11p15.5         | Hs.279554 | 176.0             | 229.0             | 825.0                | 530.0                | 202.5           | 677.5               | 3.3                           |
| 14 | proteasome 26S subunit, non-ATPase, 13 | Chr:11p15.5         | Hs.279554 | 48.0              | 47.0              | 157.0                | 95.0                 | 47.5            | 126.0               | 2.7                           |
| 15 | proteasome 26S subunit, non-ATPase, 2  | Chr:3q27.3          | Hs.74619  | 231.0             | 307.0             | 969.0                | 804.0                | 269.0           | 886.5               | 3.3                           |
| 16 | proteasome 26S subunit, non-ATPase, 4  | Chr:1q21.2          | Hs.148495 | 122.0             | 193.0             | 473.0                | 271.0                | 157.5           | 372.0               | 2.4                           |
| 17 | proteasome 26S subunit, non-ATPase, 4  | Chr:1q21.2          | Hs.148495 | 23.0              | 66.0              | 319.0                | 237.0                | 44.5            | 278.0               | 6.2                           |
| 18 | proteasome 26S subunit, non-ATPase, 5  | Chr:9q33.3          | Hs.193725 | 98.0              | 236.0             | 598.0                | 442.0                | 167.0           | 520.0               | 3.1                           |
| 19 | Proteasome 26S subunit, non-ATPase, 7  | Chr:16q23-q24       | Hs.155543 | 157.0             | 238.0             | 488.0                | 311.0                | 197.5           | 399.5               | 2.0                           |

|    |                                                                     |                     |           |       |       |        |        |       |        |      |
|----|---------------------------------------------------------------------|---------------------|-----------|-------|-------|--------|--------|-------|--------|------|
| 20 | proteasome 26S subunit, non-ATPase, 8                               | Chr:19q13.13        | Hs.78466  | 77.0  | 132.0 | 264.0  | 320.0  | 104.5 | 292.0  | 2.8  |
| 21 | proteasome 26S subunit, non-ATPase, 9                               | Chr:12q24.31-q24.32 | Hs.5648   | 101.0 | 142.0 | 339.0  | 322.0  | 121.5 | 330.5  | 2.7  |
| 22 | proteasome activator subunit 2 (PA28 beta)                          | Chr:14q11.2         | Hs.433810 | 704.0 | 734.0 | 1250.0 | 1066.0 | 719.0 | 1158.0 | 1.6  |
| 23 | proteasome activator subunit 3 (PA28 gamma; Ki)                     | Chr:17q12-q21       | Hs.152978 | 121.0 | 186.0 | 770.0  | 451.0  | 153.5 | 610.5  | 4.0  |
| 24 | proteasome activator subunit 3 (PA28 gamma; Ki)                     | Chr:17q12-q21       | Hs.152978 | 35.0  | 54.0  | 259.0  | 141.0  | 44.5  | 200.0  | 4.5  |
| 25 | proteasome subunit, alpha type, 1                                   | Chr:11p15.1         | Hs.82159  | 520.0 | 786.0 | 2419.0 | 2361.0 | 653.0 | 2390.0 | 3.7  |
| 26 | proteasome subunit, alpha type, 1                                   | Chr:11p15.1         | Hs.82159  | 443.0 | 450.0 | 2638.0 | 2441.0 | 446.5 | 2539.5 | 5.7  |
| 27 | proteasome subunit, alpha type, 1                                   | Chr:11p15.1         | Hs.82159  | 277.0 | 541.0 | 1741.0 | 1256.0 | 409.0 | 1498.5 | 3.7  |
| 28 | proteasome subunit, alpha type, 2                                   | Chr:7p13            | Hs.181309 | 162.0 | 186.0 | 510.0  | 427.0  | 174.0 | 468.5  | 2.7  |
| 29 | proteasome subunit, alpha type, 3                                   | Chr:14q23           | Hs.432428 | 43.0  | 86.0  | 630.0  | 497.0  | 64.5  | 563.5  | 8.7  |
| 30 | proteasome subunit, alpha type, 4                                   | Chr:15q24.1         | Hs.251531 | 254.0 | 335.0 | 823.0  | 707.0  | 294.5 | 765.0  | 2.6  |
| 31 | proteasome subunit, alpha type, 5                                   | Chr:1p13            | Hs.76913  | 140.0 | 200.0 | 747.0  | 836.0  | 170.0 | 791.5  | 4.7  |
| 32 | proteasome subunit, alpha type, 6                                   | Chr:14q13           | Hs.74077  | 385.0 | 494.0 | 1999.0 | 1820.0 | 439.5 | 1909.5 | 4.3  |
| 33 | proteasome subunit, alpha type, 7                                   | Chr:20q13.33        | Hs.233952 | 158.0 | 175.0 | 1068.0 | 989.0  | 166.5 | 1028.5 | 6.2  |
| 34 | proteasome subunit, alpha type, 7                                   | Chr:20q13.33        | Hs.233952 | 40.0  | 35.0  | 149.0  | 181.0  | 37.5  | 165.0  | 4.4  |
| 35 | proteasome subunit, beta type, 1                                    | Chr:6q27            | Hs.75748  | 237.0 | 329.0 | 713.0  | 647.0  | 283.0 | 680.0  | 2.4  |
| 36 | proteasome subunit, beta type, 2                                    | Chr:1p34.2          | Hs.432607 | 177.0 | 219.0 | 1265.0 | 1224.0 | 198.0 | 1244.5 | 6.3  |
| 37 | proteasome subunit, beta type, 3                                    | Chr:17q12           | Hs.82793  | 198.0 | 200.0 | 530.0  | 403.0  | 199.0 | 466.5  | 2.3  |
| 38 | proteasome subunit, beta type, 4                                    | Chr:1q21            | Hs.89545  | 625.0 | 726.0 | 1401.0 | 1507.0 | 675.5 | 1454.0 | 2.2  |
| 39 | proteasome subunit, beta type, 4                                    | Chr:1q21            | Hs.89545  | 90.0  | 146.0 | 478.0  | 494.0  | 118.0 | 486.0  | 4.1  |
| 40 | proteasome subunit, beta type, 5                                    | Chr:14q11.2         | Hs.261927 | 117.0 | 178.0 | 1445.0 | 1460.0 | 147.5 | 1452.5 | 9.8  |
| 41 | proteasome subunit, beta type, 6                                    | Chr:17p13           | Hs.77060  | 246.0 | 190.0 | 615.0  | 513.0  | 218.0 | 564.0  | 2.6  |
| 42 | proteasome subunit, beta type, 7                                    | Chr:9q34.11-q34.12  | Hs.433434 | 138.0 | 193.0 | 723.0  | 767.0  | 165.5 | 745.0  | 4.5  |
| 43 | proteasome subunit, beta type, 8 (large multifunctional protease 7) | Chr:6p21.3          | Hs.180062 | 217.0 | 258.0 | 859.0  | 622.0  | 237.5 | 740.5  | 3.1  |
| 44 | proteasome subunit, beta type, 8 (large multifunctional protease 7) | Chr:6p21.3          | Hs.180062 | 26.0  | 95.0  | 941.0  | 738.0  | 60.5  | 839.5  | 13.9 |
| 45 | proteasome subunit, beta type, 9 (large multifunctional protease 2) | Chr:6p21.3          | Hs.381081 | 203.0 | 301.0 | 766.0  | 621.0  | 252.0 | 693.5  | 2.8  |
| 46 | proteasome activator 200 kDa                                        | Chr:2p16.1          | Hs.112396 | 40.0  | 85.0  | 278.0  | 240.0  | 62.5  | 259.0  | 4.1  |

**Supplementary table 5:**

For Affymetrix GeneChip® analysis twice mRNA from three control-patients and from three donors for i.v.MACs was pooled and hybridized onto two chips. Affymetrix® analysis showed a significant downregulation of the ubiquitinylation machinery in IMACs.

Out of 64 probe sets representing 42 genes the majority had clearly a higher signal in i.v.MACs. Only for ubiquitins B and C which showed a high signal in both i.v.MACs and IMACs this was not observed. Ubiquitin D, ubiquitin carrier protein and some other probe sets showed a very low signal making the results not reliable.

|    | Gene                                                                 | Location         | Unigene   | IMACs<br>Signal 1 | IMACs<br>Signal 2 | i.v. MAC<br>Signal 1 | i.v. MAC<br>Signal 2 | Average<br>IMAC | Average<br>i.v. MAC | Ratio<br>(i.v.<br>vs.<br>IMAC) |
|----|----------------------------------------------------------------------|------------------|-----------|-------------------|-------------------|----------------------|----------------------|-----------------|---------------------|--------------------------------|
| 1  | ubiquitin activating enzyme E1-like protein                          | Chr:3p25.2       | Hs.278607 | 38.0              | 98.0              | 360.0                | 257.0                | 68.0            | 308.5               | 4.5                            |
| 2  | ubiquitin associated protein 1                                       | Chr:9p22-p21     | Hs.75425  | 135.0             | 153.0             | 445.0                | 397.0                | 144.0           | 421.0               | 2.9                            |
| 3  | ubiquitin associated protein 2                                       | Chr:9p13.2       | Hs.14953  | 84.0              | 78.0              | 185.0                | 169.0                | 81.0            | 177.0               | 2.2                            |
| 4  | ubiquitin B                                                          | Chr:17p12-p11    | Hs.356190 | 7087.0            | 7084.0            | 3491.0               | 3547.0               | 7085.5          | 3519.0              | 0.5                            |
| 5  | ubiquitin C                                                          | Chr:12q24.3      | Hs.183704 | 3998.0            | 4982.0            | 4544.0               | 4436.0               | 4490.0          | 4490.0              | 1.0                            |
| 6  | ubiquitin carboxyl-terminal esterase L1<br>(ubiquitin thiolesterase) | Chr:4p14         | Hs.76118  | 24.0              | 49.0              | 668.0                | 552.0                | 36.5            | 610.0               | 16.7                           |
| 7  | ubiquitin carboxyl-terminal esterase L3<br>(ubiquitin thiolesterase) | Chr:13q21.33     | Hs.77917  | 30.0              | 18.0              | 222.0                | 176.0                | 24.0            | 199.0               | 8.3                            |
| 8  | ubiquitin carrier protein                                            | Chr:19q13.43     | Hs.174070 | 37.0              | 37.0              | 18.0                 | 18.0                 | 37.0            | 18.0                | 0.5                            |
| 9  | ubiquitin D                                                          | Chr:6p21.3       | Hs.44532  | 108.0             | 159.0             | 10.0                 | 2.0                  | 133.5           | 6.0                 | 4.5e-2                         |
| 10 | ubiquitin protein ligase                                             | Chr:12q24.12     | Hs.17639  | 35.0              | 91.0              | 205.0                | 156.0                | 63.0            | 180.5               | 2.9                            |
| 11 | ubiquitin protein ligase E3A                                         | Chr:15q11-q13    | Hs.180686 | 155.0             | 102.0             | 361.0                | 251.0                | 128.5           | 306.0               | 2.4                            |
| 12 | ubiquitin protein ligase E3A                                         | Chr:15q11-q13    | Hs.180686 | 61.0              | 135.0             | 442.0                | 324.0                | 98.0            | 383.0               | 3.9                            |
| 13 | ubiquitin protein ligase E3A                                         | Chr:15q11-q13    | Hs.180686 | 68.0              | 84.0              | 407.0                | 233.0                | 76.0            | 320.0               | 4.2                            |
| 14 | ubiquitin specific protease 10                                       | Chr:16q24.1      | Hs.78829  | 81.0              | 109.0             | 69.0                 | 73.0                 | 95.0            | 71.0                | 0.7                            |
| 15 | ubiquitin specific protease 10                                       | Chr:16q24.1      | Hs.78829  | 64.0              | 125.0             | 315.0                | 269.0                | 94.5            | 292.0               | 3.1                            |
| 16 | ubiquitin specific protease 12                                       | Chr:5q33-q34     | Hs.42400  | 216.0             | 250.0             | 1218.0               | 804.0                | 233.0           | 1011.0              | 4.3                            |
| 17 | ubiquitin specific protease 12                                       | Chr:5q33-q34     | Hs.42400  | 22.0              | 28.0              | 21.0                 | 6.0                  | 25.0            | 13.5                | 0.5                            |
| 18 | ubiquitin specific protease 13 (isopeptidase T-3)                    | Chr:3q26.2-q26.3 | Hs.85482  | 47.0              | 96.0              | 77.0                 | 51.0                 | 71.5            | 64.0                | 0.9                            |

|    |                                                                |                 |           |       |       |        |        |       |        |      |
|----|----------------------------------------------------------------|-----------------|-----------|-------|-------|--------|--------|-------|--------|------|
| 19 | ubiquitin specific protease 14 (tRNA-guanine transglycosylase) | Chr:18p11.32    | Hs.75981  | 284.0 | 343.0 | 1346.0 | 915.0  | 313.5 | 1130.5 | 3.6  |
| 20 | ubiquitin specific protease 14 (tRNA-guanine transglycosylase) | Chr:18p11.32    | Hs.75981  | 74.0  | 70.0  | 517.0  | 308.0  | 72.0  | 412.5  | 5.7  |
| 21 | ubiquitin specific protease 15                                 | Chr:12q14       | Hs.23168  | 79.0  | 126.0 | 259.0  | 247.0  | 102.5 | 253.0  | 2.5  |
| 22 | ubiquitin specific protease 16                                 | Chr:21q22.11    | Hs.99819  | 188.0 | 319.0 | 173.0  | 204.0  | 253.5 | 188.5  | 0.7  |
| 23 | ubiquitin specific protease 18                                 | Chr:22q11.21    | Hs.38260  | 7.0   | 8.0   | 72.0   | 44.0   | 7.5   | 58.0   | 7.7  |
| 24 | ubiquitin specific protease 22                                 | Chr:17p11.1     | Hs.12064  | 322.0 | 415.0 | 742.0  | 592.0  | 368.5 | 667.0  | 1.8  |
| 25 | ubiquitin specific protease 7 (herpes virus-associated)        | Chr:16p13.3     | Hs.78683  | 219.0 | 301.0 | 825.0  | 482.0  | 260.0 | 653.5  | 2.5  |
| 26 | ubiquitin specific protease 8                                  | Chr:15q15.3     | Hs.152818 | 48.0  | 68.0  | 188.0  | 168.0  | 58.0  | 178.0  | 3.1  |
| 27 | ubiquitin-activating enzyme E1                                 | Chr:Xp11.23     | Hs.2055   | 136.0 | 215.0 | 801.0  | 363.0  | 175.5 | 582.0  | 3.3  |
| 28 | ubiquitin-activating enzyme E1-like                            | Chr:3p21        | Hs.16695  | 79.0  | 216.0 | 235.0  | 119.0  | 147.5 | 177.0  | 1.2  |
| 29 | ubiquitin-activating enzyme E1-like                            | Chr:3p21        | Hs.16695  | 129.0 | 149.0 | 135.0  | 94.0   | 139.0 | 114.5  | 0.8  |
| 30 | ubiquitination factor E4A (UFD2 homolog, yeast)                | Chr:11q23.3     | Hs.75275  | 111.0 | 165.0 | 732.0  | 513.0  | 138.0 | 622.5  | 4.5  |
| 31 | ubiquitination factor E4B                                      | Chr:1p36.3      | Hs.24594  | 155.0 | 164.0 | 653.0  | 553.0  | 159.5 | 603.0  | 3.8  |
| 32 | ubiquitination factor E4B                                      | Chr:1p36.3      | Hs.24594  | 1.0   | 3.0   | 53.0   | 20.0   | 2.0   | 36.5   | 18.3 |
| 33 | ubiquitin-conjugating enzyme E2 variant 1                      | Chr:20q13.2     | Hs.75875  | 241.0 | 348.0 | 979.0  | 747.0  | 294.5 | 863.0  | 2.9  |
| 34 | ubiquitin-conjugating enzyme E2 variant 1                      | Chr:20q13.2     | Hs.75875  | 99.0  | 189.0 | 691.0  | 534.0  | 144.0 | 612.5  | 4.3  |
| 35 | ubiquitin-conjugating enzyme E2 variant 2                      | Chr:8q11.1      | Hs.79300  | 88.0  | 157.0 | 354.0  | 247.0  | 122.5 | 300.5  | 2.5  |
| 36 | ubiquitin-conjugating enzyme E2, J1                            | Chr:6q16.1      | Hs.184325 | 143.0 | 221.0 | 996.0  | 805.0  | 182.0 | 900.5  | 4.9  |
| 37 | ubiquitin-conjugating enzyme E2, J1                            | Chr:6q16.1      | Hs.184325 | 101.0 | 196.0 | 413.0  | 365.0  | 148.5 | 389.0  | 2.6  |
| 38 | ubiquitin-conjugating enzyme E2, J1                            | Chr:6q16.1      | Hs.184325 | 121.0 | 167.0 | 509.0  | 317.0  | 144.0 | 413.0  | 2.9  |
| 39 | ubiquitin-conjugating enzyme E2, J1                            | Chr:6q16.1      | Hs.184325 | 49.0  | 58.0  | 182.0  | 206.0  | 53.5  | 194.0  | 3.6  |
| 40 | ubiquitin-conjugating enzyme E2A                               | Chr:Xq24-q25    | Hs.379466 | 306.0 | 388.0 | 1271.0 | 1002.0 | 347.0 | 1136.5 | 3.3  |
| 41 | ubiquitin-conjugating enzyme E2A                               | Chr:Xq24-q25    | Hs.379466 | 152.0 | 195.0 | 226.0  | 211.0  | 173.5 | 218.5  | 1.3  |
| 42 | ubiquitin-conjugating enzyme E2B                               | Chr:5q23-q31    | Hs.811    | 347.0 | 459.0 | 432.0  | 281.0  | 403.0 | 356.5  | 0.9  |
| 43 | ubiquitin-conjugating enzyme E2B                               | Chr:5q23-q31    | Hs.811    | 117.0 | 208.0 | 660.0  | 470.0  | 162.5 | 565.0  | 3.5  |
| 44 | ubiquitin-conjugating enzyme E2D 1                             | Chr:10q11.2-q21 | Hs.129683 | 15.0  | 16.0  | 21.0   | 2.0    | 15.5  | 11.5   | 0.7  |

|    |                                          |                 |           |       |       |        |        |       |        |     |
|----|------------------------------------------|-----------------|-----------|-------|-------|--------|--------|-------|--------|-----|
| 45 | ubiquitin-conjugating enzyme E2D 1       | Chr:10q11.2-q21 | Hs.129683 | 10.0  | 7.0   | 44.0   | 30.0   | 8.5   | 37.0   | 4.4 |
| 46 | ubiquitin-conjugating enzyme E2D 2       | Chr:5q31.3      | Hs.108332 | 185.0 | 247.0 | 1008.0 | 718.0  | 216.0 | 863.0  | 4.0 |
| 47 | ubiquitin-conjugating enzyme E2D 2       | Chr:5q31.3      | Hs.108332 | 44.0  | 39.0  | 95.0   | 67.0   | 41.5  | 81.0   | 2.0 |
| 48 | ubiquitin-conjugating enzyme E2G 1       | Chr:17p13.3     | Hs.78563  | 208.0 | 297.0 | 981.0  | 697.0  | 252.5 | 839.0  | 3.3 |
| 49 | ubiquitin-conjugating enzyme E2G 1       | Chr:17p13.3     | Hs.78563  | 49.0  | 75.0  | 424.0  | 265.0  | 62.0  | 344.5  | 5.6 |
| 50 | ubiquitin-conjugating enzyme E2G 2       | Chr:21q22.3     | Hs.192853 | 45.0  | 56.0  | 140.0  | 94.0   | 50.5  | 117.0  | 2.3 |
| 51 | ubiquitin-conjugating enzyme E2I         | Chr:16p13.3     | Hs.432833 | 258.0 | 343.0 | 816.0  | 691.0  | 300.5 | 753.5  | 2.5 |
| 52 | ubiquitin-conjugating enzyme E2L 3       | Chr:22q11.21    | Hs.108104 | 61.0  | 72.0  | 425.0  | 266.0  | 66.5  | 345.5  | 5.2 |
| 53 | ubiquitin-conjugating enzyme E2L 3       | Chr:22q11.21    | Hs.108104 | 31.0  | 35.0  | 242.0  | 140.0  | 33.0  | 191.0  | 5.8 |
| 54 | ubiquitin-conjugating enzyme E2L 3       | Chr:22q11.21    | Hs.108104 | 4.0   | 62.0  | 322.0  | 236.0  | 33.0  | 279.0  | 8.5 |
| 55 | ubiquitin-conjugating enzyme E2L 6       | Chr:11q12       | Hs.169895 | 270.0 | 325.0 | 1728.0 | 1192.0 | 297.5 | 1460.0 | 4.9 |
| 56 | ubiquitin-conjugating enzyme E2M         | Chr:19q13.43    | Hs.406068 | 16.0  | 12.0  | 129.0  | 92.0   | 14.0  | 110.5  | 7.9 |
| 57 | ubiquitin-conjugating enzyme E2N         | Chr:12q22       | Hs.75355  | 205.0 | 269.0 | 454.0  | 525.0  | 237.0 | 489.5  | 2.1 |
| 58 | ubiquitin-conjugating enzyme E2N         | Chr:12q22       | Hs.75355  | 49.0  | 128.0 | 467.0  | 307.0  | 88.5  | 387.0  | 4.4 |
| 59 | ubiquitin-like 1 (sentrin)               | Chr:2q33        | Hs.81424  | 369.0 | 435.0 | 929.0  | 930.0  | 402.0 | 929.5  | 2.3 |
| 60 | ubiquitin-like 1 (sentrin)               | Chr:2q33        | Hs.81424  | 60.0  | 121.0 | 502.0  | 497.0  | 90.5  | 499.5  | 5.5 |
| 61 | ubiquitin-like 3                         | Chr:13q12-q13   | Hs.173091 | 120.0 | 310.0 | 776.0  | 660.0  | 215.0 | 718.0  | 3.3 |
| 62 | ubiquitin-like 3                         | Chr:13q12-q13   | Hs.173091 | 45.0  | 94.0  | 272.0  | 194.0  | 69.5  | 233.0  | 3.4 |
| 63 | ubiquitin-like 4                         | Chr:Xq28        | Hs.76480  | 35.0  | 47.0  | 292.0  | 187.0  | 41.0  | 239.5  | 5.8 |
| 64 | ubiquitin-like 5                         | Chr:19p13.3     | Hs.13836  | 169.0 | 181.0 | 436.0  | 394.0  | 175.0 | 415.0  | 2.4 |
| 65 | ubiquitin-protein isopeptide ligase (E3) | Chr:7q36.3      | Hs.155287 | 63.0  | 98.0  | 644.0  | 465.0  | 80.5  | 554.5  | 6.9 |
